# Supplementary material for: Systematic review on the comparative effectiveness of foot orthoses in patients with rheumatoid arthritis
Source: PubMed Central journal article supplement (PMC6567436; doi:10.1186/s13047-019-0338-x), 2019-06-13

**Additional file 2. Forest plots of data pooling for the effect of semi-rigid FOs *versus* soft FOs on pain in the subgroups: (a) custom-made FOs versus ready-made FOs, (b) total-contact FOs versus non-total contact FOs, (c) forefoot region of interest, and (d) treatment effect after  $\geq 1$  month.**

**a.** reduction in foot pain

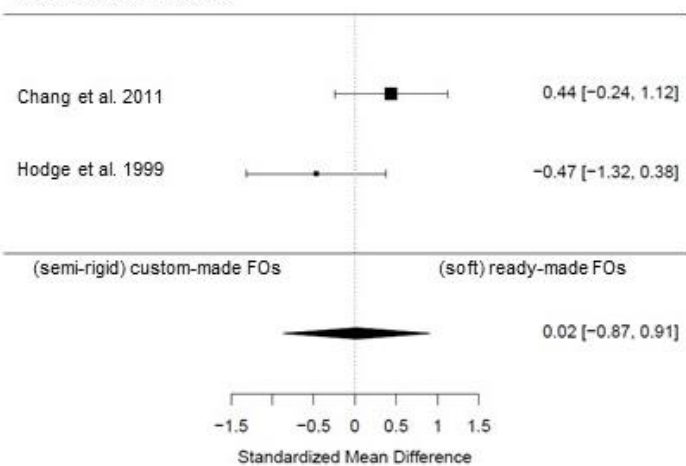

**b.** reduction in foot pain

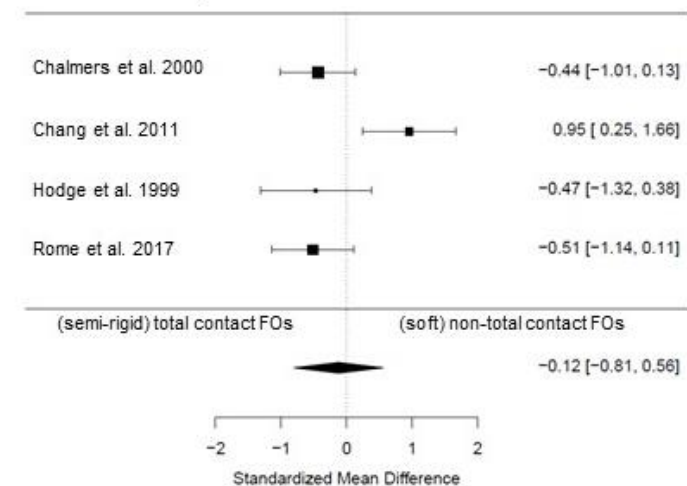

**c.** reduction in forefoot pain

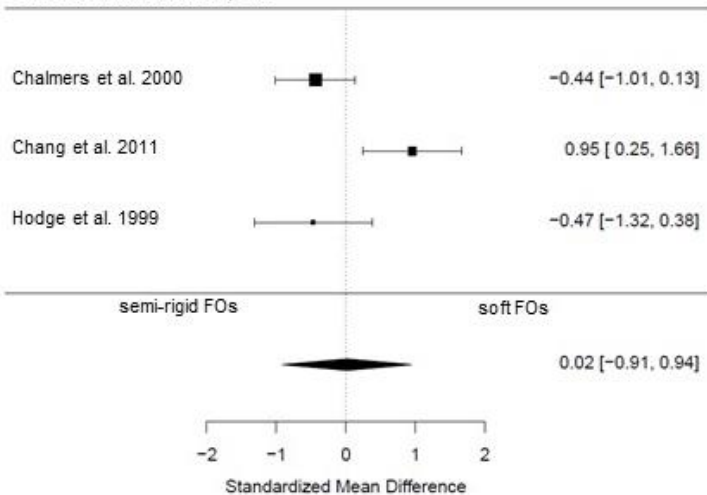

**d.** reduction in foot pain after  $\geq 1$  month wearing of FOs

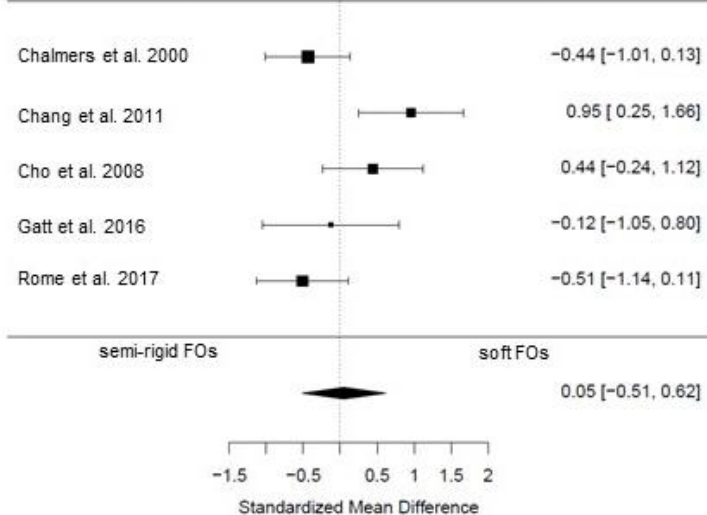

Supplement: 13047_2019_338_MOESM2_ESM.pdf [file 13047_2019_338_MOESM2_ESM.pdf]
