# Supplementary material for: Systematic review on the comparative effectiveness of foot orthoses in patients with rheumatoid arthritis
Source: PubMed Central journal article supplement (PMC6567436; doi:10.1186/s13047-019-0338-x), 2019-06-13
Supplement: 13047_2019_338_MOESM3_ESM.pdf [file 13047_2019_338_MOESM3_ESM.pdf]

### Additional file 3. Qualitative data-syntheses

| Outcome                                                                                  | Level of evidence | Results                                                                                                    | References                |
|------------------------------------------------------------------------------------------|-------------------|------------------------------------------------------------------------------------------------------------|---------------------------|
| <b><i>semi-rigid FOs (a) versus soft FOs (b)</i></b>                                     |                   |                                                                                                            |                           |
| compliance                                                                               | inconclusive      | <i>0.26 hour more wearing time a day in favor of treatment with intervention a; P = n/a</i>                | Chalmers et al. 2000 (31) |
| costs of FOs                                                                             | inconclusive      | <i>-0.03 (95% CI -0.08 – 0.03) QALYs in favor of treatment with intervention a; P = 0.46</i>               | Rome et al. 2016 (34)     |
| patient satisfaction                                                                     | inconclusive      | <i>a and b were both nominated as preferred FOs by 11 (out of 24) participants; P = n/a</i>                | Chalmers et al. 2000 (31) |
|                                                                                          |                   | <i>82% more participants nominated intervention b as preferred FOs; P = n/a</i>                            | Chang et al. 2011 (35)    |
|                                                                                          |                   | <i>20% more participants nominated intervention a as preferred FOs; P = n/a</i>                            | Hodge et al. 1995 (36)    |
| <b><i>custom-made (semi-rigid) FOs (a) versus ready-made (soft) FOs (b)</i></b>          |                   |                                                                                                            |                           |
| foot function, construct plantar pressure                                                | inconclusive      | <i>0.99 (16%) lower forefoot plantar pressure (PTI) in favor of treatment with intervention b; P = n/a</i> | Hodge et al. 1995 (36)    |
| patient satisfaction                                                                     | inconclusive      | <i>20% more participants nominated intervention a as preferred FOs; P = n/a</i>                            | Hodge et al. 1995 (36)    |
| <b><i>total-contact (semi-rigid) FOs (a) versus non-total-contact (soft) FOs (b)</i></b> |                   |                                                                                                            |                           |
| costs of FOs                                                                             | inconclusive      | <i>-0.03 (95% CI -0.08 – 0.03) QALYs in favor of treatment with intervention a; P = 0.46</i>               | Rome et al. 2016 (34)     |
| patient satisfaction                                                                     | inconclusive      | <i>a and b were both nominated as preferred FOs by 11 (out of 24) participants; P = n/a</i>                | Chalmers et al. 2000 (31) |
|                                                                                          |                   | <i>82% more participants nominated intervention b as preferred FOs; P = n/a</i>                            | Chang et al. 2011 (35)    |
|                                                                                          |                   | <i>20% more participants nominated intervention a as preferred FOs; P = n/a</i>                            | Hodge et al. 1995 (36)    |

***selective laser sintered FOs (a) versus standard custom-made FOs (b)***

|                                 |              |                                                                                                              |                          |
|---------------------------------|--------------|--------------------------------------------------------------------------------------------------------------|--------------------------|
| foot function, plantar pressure | inconclusive | 9.3 (13.6) lower medial forefoot plantar pressure (PP) in favor of treatment with intervention a; $P = 1.00$ | Gibson et al. (11)       |
| foot function, gait             | inconclusive | 2 more steps per minute (cadence) in favor of treatment with intervention b; $P = n/a$                       | Pallari et al. 2010 (38) |
| patient satisfaction            | inconclusive | 2.4 higher VAS fit of FOs in favor of treatment with intervention b; $P \geq 0.05$                           | Pallari et al. 2010 (38) |

***FOs with metatarsal bars (a) versus FOs with metatarsal domes (b)***

|                      |              |                                                                                                |                          |
|----------------------|--------------|------------------------------------------------------------------------------------------------|--------------------------|
| foot pain            | inconclusive | 7 mm on VAS-score less pain in favor of treatment with intervention b                          | Hodge et al. 1995 (36)   |
| patient satisfaction | inconclusive | intervention a was nominated by 30% of participants and intervention b by 50% as preferred FOs | Hodge et al. 1995 (36)   |
|                      |              | intervention a was nominated by 30% of participants and intervention b by 70% as preferred FOs | Jackson et al. 2004 (32) |

---

*FOs = foot orthoses. VAS = visual analogue scale. QALYs = quality-adjusted life years. PTI = pressure time integral. PP = peak pressure.*
