# Supplementary material for: Systematic review on the comparative effectiveness of foot orthoses in patients with rheumatoid arthritis
Source: PubMed Central journal article supplement (PMC6567436; doi:10.1186/s13047-019-0338-x), 2019-06-13

**Additional file 4. Funnel plots for the comparison 'semi-rigid FOs versus soft FOs' on the outcomes (a) foot pain and (b) physical functioning**

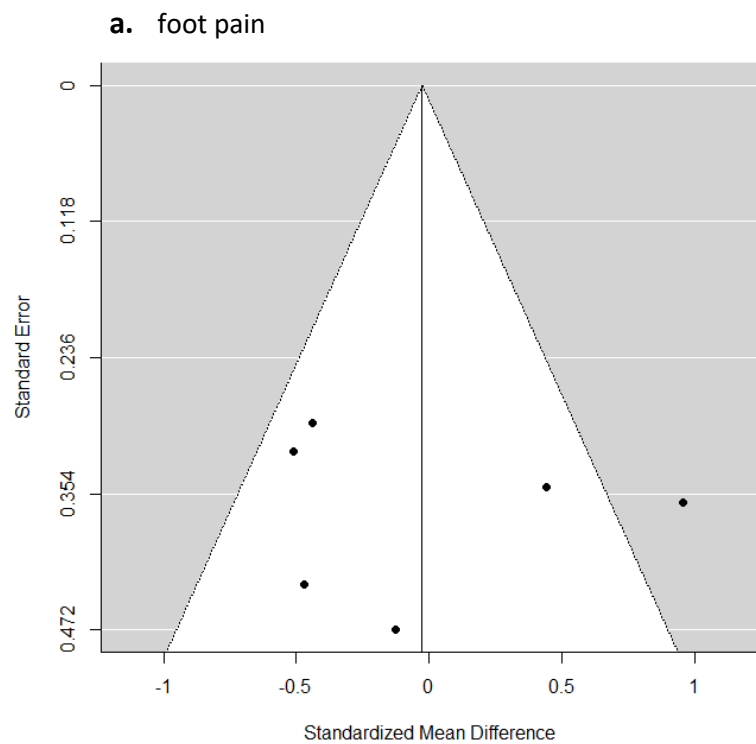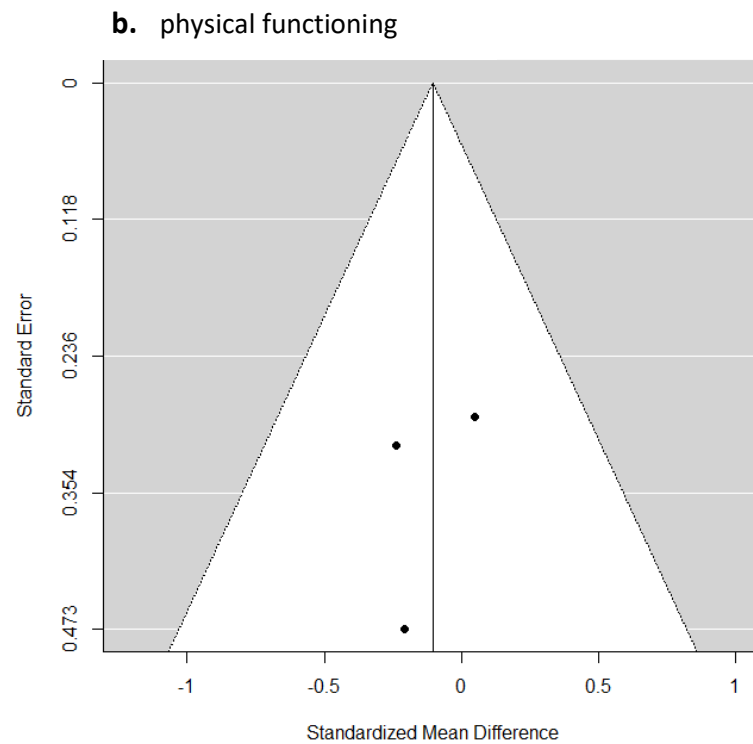

Supplement: 13047_2019_338_MOESM4_ESM.pdf [file 13047_2019_338_MOESM4_ESM.pdf]
